**Title: Defective photosynthetic adaptation mechanism in winter restricts the  
introduction of overwintering plant to high latitudes**

**Running title: Photosynthetic adaptation in introduced overwintering plant**

Yue-Nan Li<sup>1,†</sup>, Yu-Ting Li<sup>1,†</sup>, Alexander G. Ivanov<sup>2,3</sup>, Wan-Li Jiang<sup>1</sup>, Xing-Kai Che<sup>1</sup>,  
Ying Liang<sup>1</sup>, Zi-Shan Zhang<sup>1,\*</sup>, Shi-Jie Zhao<sup>1,\*</sup>, Hui-Yuan Gao<sup>1,\*</sup>

<sup>1</sup>State Key Laboratory of Crop Biology Shandong Key Laboratory of Crop Biology  
College of Life Sciences, Shandong Agricultural University, Tai'an 271018, China

<sup>2</sup>Department of Biology and the Biotron Centre for Experimental Climate Change  
Research, University of Western Ontario, London, Ontario Canada N6A 5B7

<sup>3</sup>Institute of Biophysics and Biomedical Engineering, Bulgarian Academy of  
Sciences, Acad. G. Bonchev Str. bl. 21, 1113 Sofia, Bulgaria

Yuenan Li's e-mail address: [1786602004@qq.com](mailto:1786602004@qq.com)

Yuting Li's e-mail address: [liyuting0531@163.com](mailto:liyuting0531@163.com)

Alexander G. Ivanov's e-mail address: [aivanov@uwo.ca](mailto:aivanov@uwo.ca)

Wanli Jiang's e-mail address: [jangwanli@163.com](mailto:jangwanli@163.com)

Xingkai Che's e-mail address: [chexingkai@163.com](mailto:chexingkai@163.com)

Ying Liang's e-mail address: [yingliang2016@163.com](mailto:yingliang2016@163.com)

\*Correspondence: Z-S Zhang, E-mail: [zhangzishantain@163.com](mailto:zhangzishantain@163.com), Tel: 13581191679

\*Correspondence: S-J Zhao, E-mail: [sjzhao@sdau.edu.cn](mailto:sjzhao@sdau.edu.cn), Tel: 13001777759

\*Correspondence: H-Y Gao, E-mail: [gaohy@sdau.edu.cn](mailto:gaohy@sdau.edu.cn), Tel: 13002772195

The date of submission: 18 April 2019

Highlights: Introduced overwintering species exhibited lower capacity for photosynthetic CO<sub>2</sub> fixation and higher susceptibility for photoinhibition than native overwintering species during winter, which may limit their growth and survival.

**Abstract:** Because of the need for agriculture and landscaping, many overwintering evergreen and biennial species that maintain green leaves over winter were introduced to higher latitudes. The green leaves of introduced overwintering species have to withstand a harsher winter, especially lower temperature, than in their native region of origin. Although the responses and adaptability of photosynthetic apparatus to winter conditions in native overwintering species were widely studied, the experimental results on the introduced overwintering species are very limited. Here, the photosynthetic adaptability during winter was analyzed in two native overwintering

species, pine (woody plants), winter wheat (herb), and two introduced overwintering species, bamboo (woody plants), lilyturf (herb). The native species exhibited higher capacity for photosynthetic CO<sub>2</sub> fixation and lower susceptibility for photoinhibition than introduced species during winter. Photosynthesis related proteins, such as PsbA, PsaA, Rubisco and Lhcb1, were marginally affected in native species, but significantly degraded in introduced species during winter. More interestingly, the PSII photoinhibition was mainly caused by up-regulation of photoprotection mechanism, non-photochemical quenching, in native species, but by photodamage in introduced species. This study indicates that the growth and survival of introduced overwintering species is limited by their photosynthetic adaptability to the harsher winter conditions at high latitudes.

**Key words:** adaptive mechanism, biennial species, evergreen species, introduced species, native species, overwintering species, photoinhibition, photoprotection

## 1 **Introduction**

2 Plants can be divided into deciduous and evergreen (overwintering) species  
3 according to their leaves habit during winter. The overwintering species maintain  
4 green leaves (or needles) over the winter. To meet the needs of agriculture and  
5 landscaping, many overwintering evergreen and biennial species, including trees and  
6 crops, were introduced to higher latitudes. The introduction of overwintering species  
7 to higher latitudes is more difficult than deciduous species due to the environmental  
8 challenges that green leaves of introduced overwintering species has to withstand  
9 harsher winter conditions compared to their native region of origin. The survival and  
10 avoiding serious injuries of evergreen leaves during winter is critical for the success  
11 of introduced species to higher latitudes. In winter, the green leaves of overwintering  
12 species have to withstand and cope not only the dehydration and frost damage but  
13 also the possible photodamage of photosynthetic apparatus caused by excess light  
14 absorption by the chlorophylls in evergreen leaves (Öquist and Huner, 2003). The  
15 low temperatures in winter imposes thermodynamic restrictions and slows down the  
16 activities of Calvin cycle related enzymes, so not 100% of the light absorbed by the  
17 light harvesting complexes (LHC) can be utilized for CO<sub>2</sub> fixation. The imbalance  
18 between the capacity for harvesting light energy and the capacity to dissipate this  
19 energy through metabolic activity such as CO<sub>2</sub> assimilation, can potentially result in  
20 generation of reactive oxygen species (ROS) leading to photoinhibition and  
21 photooxidative damage of photosystem II (PSII) (Aro *et al.*,1993; Takahashi and  
22 Badger, 2011).In addition to PSII, various environmental stress conditions can also

23 cause photoinhibitory damage on photosystem I (PSI) (Sonoike and Terashima,  
24 1994; Sonoike, 1995; Ivanov *et al.*, 1998).

25 The effects of low temperature and high light during winter on photosynthetic  
26 apparatus of native overwintering species and their photosynthetic adaptability  
27 during winter have been extensively studied (Adams *et al.*, 2001; 2004; Öquist and  
28 Huner, 2003; Verhoeven, 2014; Míguez *et al.*, 2015).

29 The photosynthetic CO<sub>2</sub> fixation was almost completely inhibited during winter  
30 in evergreen trees (Öquist and Huner, 2003; Russell *et al.*, 2009; Savitch *et al.*,  
31 2010). These changes were accompanied by significant alterations in chloroplast  
32 ultrastructure resulting in a substantial loss of thylakoid grana during winter (Yokono  
33 *et al.*, 2008; Maslova *et al.*, 2009; Silva-Cancino *et al.*, 2012). Both PSI and PSI  
34 photochemical activities decreased (Ottander *et al.*, 1995; Ivanov *et al.*, 2001; 2002;  
35 Ensminger *et al.*, 2004; Robakowski *et al.*, 2005) and this was attributed to  
36 degradation of a number of PSII and PSI related proteins during winter (Ottander *et*  
37 *al.*, 1995; Ebbert *et al.*, 2005; Verhoeven *et al.*, 2009; Míguez *et al.*, 2017). However,  
38 the PSII photoinhibition was more pronounced than that of PSI during winter  
39 (Ivanov *et al.*, 2001; 2006).

40 The sustained non-photochemical quenching is very important in protecting PSII  
41 from damage to the photosynthetic mechanism in winter (Verhoeven *et al.*, 1999;  
42 Demmig-Adams and Adams, 2000; Gilmore and Ball, 2000; Verhoeven, 2014). The  
43 radiationless dissipation of excess light occurring within the PSII reaction center was  
44 enhanced and could also contribute to the PSII photoprotection during winter

45 (Gilmore and Ball, 2000; Ivanov *et al.*, 2002; Gilmore *et al.*, 2003; Yokono *et al.*,  
46 2008). It has been reported that accumulation of PsbS and/or Elip-like proteins  
47 during winter can also play an important role in photoprotection (Savitch *et al.*,  
48 2002; Ebbert *et al.*, 2005; Verhoeven *et al.*, 2009; Zarter *et al.*, 2010; Míguez *et al.*,  
49 2017).

50 In addition to non-photochemical quenching processes, PSI-dependent cyclic  
51 electron flow (CEF) has been also suggested to play a significant role in preventing  
52 the photosynthetic apparatus from photodamage (Takahashi *et al.*, 2009; Ivanov *et*  
53 *al.*, 2012) and PSI-dependent CEF was reported to be enhanced during winter  
54 (Manuel *et al.*, 1999; Ivanov *et al.*, 2001).

55 The overwintering plants also reduced the chlorophyll concentration but  
56 increased carotenoids or anthocyanins concentrations during winter to lower the  
57 extent of photoinhibitory damage (Ottander *et al.*, 1995; Matsubara *et al.*, 2002;  
58 Robakowski *et al.*, 2005; Maslova *et al.*, 2009; Hughes, 2011; Wong and Gamon,  
59 2015).

60 Although the photosynthetic performance of native overwintering species during  
61 winter has been extensively studied (Adams *et al.*, 2001; 2004; Öquist and Huner,  
62 2003; Verhoeven *et al.*, 2014; Míguez *et al.*, 2015), little is known about the  
63 photosynthetic adaptability during winter in introduced overwintering species. It has  
64 been reported that the photoinhibitory response and adaptation strategy during winter  
65 are different between woody and herbaceous plants (Verhoeven *et al.*, 1999; Savitch

66 *et al.*, 2002; Margesin *et al.*, 2007; Miguez *et al.*, 2017). For that reason, both woody  
67 and herbaceous plants were used in this research. The common native overwintering  
68 species, lacebark pine (*Pinusbungeana*) and winter wheat (*Triticumaestivum*), a  
69 woody and herbaceous plants, respectively, were compared to bamboo  
70 (*Phyllostachysglauca*) and lilyturf (*Ophiopogonjaponicus*), a woody and herbaceous  
71 plants, respectively, introduced from south of China.

72 Here, the photosynthetic performance and the adaptive response during winter in  
73 two native overwintering species and two introduced overwintering species were  
74 compared by analyzing the photosynthetic gas exchange, chlorophyll a fluorescence,  
75 820-nm light reflection and the relative abundance of photosynthesis related protein.

76

## 77 **Materials and Methods**

### 78 *Plant materials*

79 Four overwintering species including two woody species and two herbaceous species  
80 were used in this study. The lacebark pine (*Pinusbungeana* Zucc. ex Endl.) and  
81 winter wheat (*Triticumaestivum* L.) are woody and herbaceous species, respectively,  
82 are common native overwintering plants in Tai'an, where this experiment was  
83 performed. The bamboo (*Phyllostachysglauca* McClure) and lilyturf  
84 (*Ophiopogonjaponicus* (Thunb) Ker-Gawl) are woody and herbaceous plants,  
85 respectively, which were introduced from the south of China and are very popular  
86 and widely used as landscape greenery in the north of China.

87 All plants were grown in the south campus of Shandong Agricultural University,  
88 Tai'an City, Shandong Province, China (N36°09'49.78", E117°09'4.72").  
89 Current-year leaves (needles) from exposed branches of 30-year-old pine tree and  
90 5-year-old bamboo, as well as leaves of current-year lilyturf and winter wheat were  
91 collected for analysis at 9:30 am from October 2017 to March 2018. Dark-adapted  
92 (30 min) leaves were used for physiological measurements (Chl a fluorescence and  
93 820-nm light reflectance). Additional leaves were rapidly weighed, frozen in liquid  
94 N<sub>2</sub> and kept at -80°C for further analyses.

95 Seasonal variations of temperature, light intensity and daily illumination  
96 duration were obtained from a weather station located close to the study site (Fig. 1).

97

#### 98 *Determination of photosynthetic pigments*

99 Frozen leaf samples were ground to a powder in liquid N<sub>2</sub> and pigments were  
100 extracted by 80% (v/v) aqueous acetone. After centrifugation at 10000 x g for 5 min,  
101 the contents of Chl<sub>a</sub>, Chl<sub>b</sub> and total carotenoids in the supernatant were determined  
102 spectrophotometrically as described by Arnon (1949) and Porra *et al.* (1989).

103

#### 104 *Photosynthetic gas exchange measurements*

105 The net photosynthetic rates (P<sub>n</sub>) in attached leaves were measured using a CIRAS-3  
106 portable photosynthesis system (PP Systems International, Inc., Amesbury,



107 MAUSA). The gas exchange measurements were performed from 10:00 to 15:00.  
108 The light intensity ( $1200 \mu\text{mol m}^{-2} \text{s}^{-1}$ , 90% red light plus 10% blue light),  $\text{CO}_2$   
109 concentration ( $400 \mu\text{mol mol}^{-1}$ ) and relative humidity (about 60%) were controlled  
110 by the automatic control device of the CIRAS-3 portable photosynthetic system.

111

#### 112 *Measurements of the chlorophyll a fluorescence and 820-nm light reflection*

113 The Chl a fluorescence and the 820-nm light reflection measurements on  
114 dark-adapted (30 min) leaves and needles were performed using an integral  
115 Multifunctional Plant Efficiency Analyser (M-PEA; Hansatech, UK) under ambient  
116  $\text{CO}_2$  and  $\text{O}_2$  concentrations, and temperatures corresponding to the natural conditions  
117 as described earlier (Gao *et al.*, 2014; Zhang *et al.*, 2016). The dark-adapted leaves  
118 were illuminated by a two seconds saturating red light pulse ( $5000 \mu\text{mol photons}$   
119  $\text{m}^{-2} \text{s}^{-1}$ ) to obtain the maximum quantum yield of PSII (Fv/Fm). In addition, in  
120 dark-adapted leaves, the original value of 820-nm signal ( $I_o$ ) was firstly recorded,  
121 after that a twenty seconds of 10% far red light was applied, followed by a saturating  
122 red light pulse (1s,  $5000 \mu\text{mol photons m}^{-2} \text{s}^{-1}$ ) to obtain the complete P700  
123 oxidation (Pm, 100% P700<sup>+</sup>). The light induced P700 transient from Po to Pm  
124 (P700<sup>+</sup>) was used as a measure for the relative content of the active reaction centers  
125 of PSI (Klughammer and Schreiber, 2008).

126

#### 127 *SDS-PAGE and immunoblot analysis*

128 To extract soluble protein and thylakoid membranes were prepared in accordance with  
129 previous methods (Zhang *et al.*, 2016; 2017). The thylakoid proteins contain 5  $\mu$ g  
130 chlorophyll or 8  $\mu$ L soluble protein supernatant were solubilized and separated by  
131 SDS-PAGE on 15% (w/v) acrylamide gels. Immunoblotting was performed by  
132 electrophoretically transferring the proteins from SDS-PAGE gels to nitrocellulose  
133 membranes (Bio-Rad Laboratories, Hercules, CA) according to the instruction book.  
134 The nitrocellulose membranes were blocked with 5% (w/w) skimmed milk and  
135 then incubated for 2 h with primary antibodies raised against the large subunit of  
136 Rubisco (1:5000), reaction centre protein of PSI, PsaA (1:2000), the reaction centre  
137 PsbA protein of PSII, PsbA(1:2000), the light harvesting proteins of PSI,  
138 Lhca1(1:2000), the major light harvesting protein of PSII complex (LHCII),  
139 Lhcb1(1:2000) and PsbS protein (1:2000). Subsequently, the membranes were  
140 incubated with horseradish peroxidase-conjugated anti-rabbit IgG antibody  
141 (Solarbio, Beijing, China) for 2 h. Immunoreaction of specific polypeptides was  
142 detected by using Supersignal West Pico substrate (Termo Fisher Scientific,  
143 Shanghai, China) chemiluminescence detection kit and the immunoblots were  
144 visualized by using a Tanon-5500 cooled CCD camera (Tanon, Shanghai, China).  
145 The primary antibodies of Rubisco and PsbA were purchased from GenScript Co.  
146 Ltd. (Nanjing, China). The primary Lhcb1, PsbS, PsaA, and Lhca1 antibodies were  
147 purchased from AgriSera AB (Vanas, Sweden). Densitometric scanning and  
148 quantitative analysis of each replicate immunoblot was performed with a ImageJ  
149 1.48v densitometry software (Wayne Rosband, National Institute of Health, USA,

150 <http://rsb.info.nih.gov/ij>).

151

152 *Statistical analysis*

153 All data points represent mean values  $\pm$  SD calculated from 3-20 independent  
154 measurements. Tukey-Kramer's method was used to analyze differences between the  
155 treatments using SPSS 11.

156

## 157 **RESULTS**

158 *Environmental factors*

159 Typical winter season in Tai'an, the investigation site, includes December, January  
160 and February. The average daily lowest temperatures were below 0°C during winter  
161 but higher than 0°C before December and after February. On the coldest day the  
162 measurements were performed (Jan. 24 2018) the daily lowest temperature was  
163 -9.1°C and the daily highest temperature was 0.5°C (Fig. 1). The illumination  
164 duration on Jan. 24 was also the shortest. The daily maximum light intensity was  
165 independent of the season.

166

167 *Pigment content*

168 Chlorophylls are essential for the light absorption or light harvesting within the LHC  
169 polypeptides of PSII and PSI, excitation, energy transfer to the reaction centers of

170 PSII and PSI and transformation of light energy to charge separated states within the  
171 reaction centers of PSII and PSI. Carotenoids not only act as supplementary  
172 light-harvesting pigments, but also play an important role in protecting the  
173 photosynthetic apparatus from the harmful effects of reactive oxygen species (ROS),  
174 especially singlet oxygen (Sandmann *et al.*, 2014). The total chlorophyll (Chl a +  
175 Chl b) content of the native species did not exhibit seasonal variability in winter  
176 wheat (Fig. 2A), but was decreased by 20-25% in lacebark pine during the winter  
177 season (Fig. 2B). In contrast, the introduced species exhibited a distinct seasonal  
178 pattern demonstrating almost 20% and 45% decrease of total chlorophyll content in  
179 lilyturf and bamboo leaves respectively, during the winter followed by its gradual  
180 and complete recovery during the spring months of March and April (Fig. 2A, B).  
181 The ratio of Chl a to Chl b (Chl a / Chl b; Fig. 2C, D) kept stable during winter in  
182 all four species used in this study.

183 The total carotenoids content of leaves/needles in both native species  
184 demonstrated clear seasonal response (Fig. 2C, D). The carotenoids content was  
185 significantly increased by 20% (winter wheat) and almost 40% (lacebark pine)  
186 during the winter, while no significant seasonal changes in carotenoids content of  
187 both introduced species were observed (Fig. 2C, D). The ratio of carotenoids to  
188 chlorophyll content (Car / Chl; Fig. 2G, H) increased significantly during winter in  
189 all four species, but the change of this ratio was similar in native and introduced  
190 species.

191 These results imply that the native species are able to maintain higher light

192 absorption and photoprotection capacity during winter compared to the introduced  
193 species.

194

#### 195 *Photosynthetic CO<sub>2</sub> fixation*

196 The net photosynthetic rates (Pn) of both pine and bamboo woody plants were  
197 completely inhibited during winter and sharply recovered during the spring (April)  
198 (Fig. 3B). In contrast with woody plants, the photosynthetic CO<sub>2</sub> fixation is still  
199 active during winter in both herbaceous species, although the Pn was significantly  
200 lower in winter compared to the Pn values registered in autumn and spring (Fig. 3A).  
201 The Pn decreased by 80~84% during winter in lilyturf but only 33~41% in winter  
202 wheat (Fig. 3A).

203

#### 204 *PSII and PSI photochemical activities*

205 The maximum quantum yield of PSII measured as  $F_v/F_m$  and the oxidation of P700  
206 to P700<sup>+</sup> (Pm) measured as light induced changes of 820-nm reflectance reflecting  
207 the primary photochemical activity of PSII and the relative content of active PSI  
208 reaction centers, respectively, were used to assess the seasonal changes of both PSII  
209 ( $F_v/F_m$ ) and PSI (Pm).

210 In agreement with a numerous earlier reports (Ottander *et al.*, 1995; Lundmark  
211 *et al.*, 1998; Ivanov *et al.*, 2001; Porcar-Castell *et al.*, 2008; Verhoeven *et al.*, 2009;  
212 Pieruschka *et al.*, 2014) the photochemical efficiency of PSII ( $F_v/F_m$ ) decreased

213 significantly reaching  $F_v/F_m$  values of about 0.3 during winter and recovered sharply  
214 in the spring in both woody species studied (Fig. 4B). It should be mentioned that  
215 the seasonal responses of  $F_v/F_m$  were practically undistinguishable for the native  
216 (pine) and introduced (bamboo) species (Fig. 4B). Interestingly, the effects of  $F_v/F_m$   
217 to winter chilling were less pronounced in winter wheat and lilyturf compared to the  
218 woody species (Fig. 4A). In addition, while PSII photochemistry of lilyturf  
219 decreased by 40%, winter wheat was only marginally affected (Fig. 4A).

220 In addition to PSII photochemistry, seasonal changes of PSI photochemical  
221 performance were also followed by assessing the oxidation of P700 to P700<sup>+</sup> (Pm).  
222 The extent of P700 photooxidation (Pm) exhibited minimal seasonal changes in  
223 winter wheat, while a significant decrease (35%) of Pm was registered in lilyturf  
224 during winter (Fig. 5A). In contrast to winter wheat and lilyturf, much stronger  
225 decrease (almost 70%) of Pm was registered in the woody species during the winter  
226 (Fig. 5B). It should be mentioned that while Pm values of pine recovered to 85% in  
227 March, the recovery of PSI photochemistry in bamboo was much slower and  
228 recovered to only 70% in April (Fig. 5B). These results clearly indicate that both PSI  
229 and PSII photochemical activities are more sensitive to winter photoinhibition in the  
230 introduced species (lilyturf and bamboo) compared to the native species (winter  
231 wheat and pine) studied.

232

233 *Immunoblot analysis*

234 The content of Rubisco, the key enzymes in photosynthetic carbon fixation was  
235 examined by immunoblot analysis. Representative immunoblots of the large subunit  
236 of Rubisco (RbcL) indicated that its relative abundance remained unchanged or even  
237 increased during winter in the two native species, i.e. pine and winter wheat, but was  
238 significantly reduced in the introduced species, lilyturf and bamboo (Fig. 6A, D). The  
239 quantitative densitometric analysis also showed that the relative abundance of RbcL  
240 was marginally affected in winter wheat and pine, while in lilyturf and bamboo RbcL  
241 was decreased by 22.3% and 68.4%, respectively, during winter.

242 The relative abundance of PsbA (D1) (Fig. 6B, E) and PsaA (Fig. 6H, K)  
243 polypeptides, the core proteins of PSII and PSI reaction centers, respectively  
244 followed similar seasonal pattern. The relative amounts of PsbA (D1) and PsaA  
245 proteins, remained largely unaffected in native species during winter, while D1, was  
246 significantly reduced by 24.8% and 65.3% in lilyturf and bamboo, respectively (Fig.  
247 6B, E). The amounts of PsaA were also decreased by 36.9% and 46.7% in lilyturf  
248 and bamboo, respectively, during winter season (Fig. 6H, K).

249 The representative immunoblots of the major constituents of the light harvesting  
250 Chla/b-protein complexes (LHC) associated with PSII (Lhcb1) and PSI (Lhca1)  
251 (Jansson, 1999) also demonstrated complex seasonal dynamics. The relative amount  
252 of Lhcb1 protein, the major subunit of LHCII, significantly decreased by 48.7% in  
253 bamboo during winter, compared to pine and both herbaceous species, where the  
254 amounts of Lhcb1 were marginally affected (Fig. 6C, F) In contrast, the content of  
255 LHCI subunit, Lhca1 protein, significantly decreased during the winter period in all

256 species analyzed in this study (Fig. 6I, L).

257 PsbS protein is considered to play an essential role (Li *et al.*, 2000) in  
258 developing the non-photochemical quenching (NPQ) of excess light energy, the most  
259 important photoprotective mechanism to PSII (Horton *et al.*, 1996; Li *et al.*, 2009; de  
260 Bianchi *et al.*, 2010). The typical immunoblots presented in Fig. 6D and the  
261 quantitative densitometric analysis (Fig. 6J, G) clearly indicate that the relative  
262 content of PsbS protein increased by 24% and 23.5% in pine and winter wheat,  
263 respectively during winter, but remained unchanged in the introduced species  
264 (lilyturf and bamboo) (Fig. 6D).

265

## 266 **Discussion**

267 This study provided evidences to prove that although some overwintering species  
268 have been successfully introduced to high latitudes from warmer areas, the  
269 photosynthetic adaptability to harsh winter is defective, and therefore cause the more  
270 serious photoinhibition in introduced species during winter, which may limit the  
271 growth and survival of introduced species at high latitudes.

272

273 *The lower photosynthetic CO<sub>2</sub> fixation capacity in introduced species than native*  
274 *species during winter*

275 This study showed that, the herbaceous species retain considerable photosynthetic



276 CO<sub>2</sub> fixation capacity but the Pn was approximately zero in woody species during  
277 winter (Fig. 3). Previous indoor research has reported that after an artificial 5°C cold  
278 acclimation, the Pn significantly decreased in lodgepole pine but was almost  
279 completely maintained in winter wheat (Savitch *et al.*, 2002). The authors presumed  
280 that the photosynthetic adaptation strategies in winter are different between  
281 herbaceous and woody plants (Savitch *et al.*, 2002). These earlier results generated  
282 in chamber experiment are confirmed in field experiments presented in this study.  
283 We also observed that Rubisco (RbcL) content was significantly reduced in both  
284 introduced species but remained almost unaffected in native species, regardless of  
285 herbaceous and woody species (Fig. 6A). The Rubisco possesses low catalytic  
286 efficiency and always restrict photosynthetic CO<sub>2</sub> fixation (Raines, 2003). Therefore  
287 the lower amount of Rubisco in introduced herbaceous species may contribute to the  
288 more serious decrease of Pn during winter compared with native herbaceous species.  
289 Moreover, although CO<sub>2</sub> fixation was completely inhibited during winter in woody  
290 species, the maintenance of relatively high amounts of Rubisco is still beneficial.  
291 Studies have shown that the synthesis of Rubisco requires nitrogen, and Rubisco  
292 accounts for up to 30% of total leaf nitrogen (Makino *et al.*, 2003; Makino, 2011). To  
293 recover the CO<sub>2</sub> fixation capacity during the next spring, the degraded Rubisco need  
294 to be re-synthesized in woody introduced species. Therefore, although the reduced  
295 Rubisco content in woody introduced species did not influence its winter CO<sub>2</sub>  
296 fixation, it would delay the rapid recovery of photosynthesis during the next spring.

297 The degradation of Rubisco was also observed in cucumber and bean leaves

298 during chilling-light condition, which was attributed to generation of excess reactive  
299 oxygen species (ROS) (Nakano *et al.*, 2006; 2010). The ROS also took part in the  
300 Rubisco degradation under continuous mist or rain treatment under illumination  
301 (Ishibashi *et al.*, 1996; Ishibashi and Terashima, 1996; Hanba *et al.*, 2004; Nakano *et*  
302 *al.*, 2006) and during senescence (Nakano *et al.*, 2006; Feller *et al.*, 2008; Ono *et al.*,  
303 2013). This experimental results presented in this study clearly demonstrate that both  
304 the PSII and PSI are more susceptible to photoinhibitions in introduced species than  
305 in native species (Fig. 4, 5). Earlier studies suggested that over-accumulation of ROS  
306 is one of the major reasons causing both PSI and PSII photoinhibiton (Choi *et al.*,  
307 2002; Sonoike, 2011; Zhang *et al.*, 2014). So, we speculate that the more ROS  
308 caused by cold temperature and high light of winter in introduced species contributes  
309 to the degradation of Rubisco.

310

311 *The higher PSII photodamage and weaker PSII photoprotection in introduced*  
312 *species than native species during winter*

313 The Fv/Fm decreased more serious in introduced herbaceous species than in native  
314 herbaceous species, but the decrease of Fv/Fm was almost the same in two woody  
315 species (Fig. 4). It should be noticed that sole analyzing the change of Fv/Fm is not  
316 enough to reflect the damage degree of PSII, which is due to both the PSII damage  
317 and photoprotection can decrease the Fv/Fm (Adams *et al.*, 1994; Maxwell and  
318 Johnson, 2000; Verhoeven, 2013). The essential of PSII damage is the net

319 degradation of D1 protein, the core protein of PSII reaction center (Vass, 2012;  
320 Yoshioka-Nishimura and Yamamoto, 2014). The capacity of NPQ is depend on the  
321 amount of PsbS protein and carotenoids, especially xanthophyll and lutein cycle  
322 pigments (Li *et al.*, 2000; de Bianchi *et al.*, 2010; Verhoeven, 2014). Therefore, we  
323 next analyzed the amount of D1 and PsbS protein. The D1 protein kept constant or  
324 slightly decreased and the PsbS protein content increased in native species, in  
325 contrast, the introduced species's D1 protein decreased more obviously but the PsbS  
326 content was unchanged during winter. In addition, the carotenoids content increase in  
327 winter only in native species rather than in introduced species (Fig. 2). Above results  
328 proved that the reason caused the decrease of Fv/Fm was different between native  
329 and introduced species: the NPQ, one photoprotection mechanism, in native species  
330 but photodamage in introduced species.

331 Different from introduced species, the native species retained all chlorophyll  
332 (Fig. 2) and light-harvesting complex protein of PSII (Lhcb1; Fig. 6). Similar with  
333 Rubisco, the chlorophyll and light-harvesting complex also contained massive  
334 nitrogen (Makino *et al.*, 2003) and therefore hard to re-synthesized during next  
335 spring. The reservation of chlorophyll and LHCII in native species will be beneficial  
336 for the rapid recovery of photosynthesis during the next spring. The reservation of  
337 chlorophyll and LHCII also indicates that the light absorbed by PSII during winter  
338 were higher in native species. Although the absorbed light was higher, the  
339 photodamage of PSII is alleviated in native species, which may be contributed by  
340 two mechanisms: (1) faster dissipation of light energy through NPQ and (2) more

341 efficient utilization of light energy through CO<sub>2</sub> fixation.

342

343 *Higher PSI photoinhibition in introduced species than native species during winter*

344 During winter, the Pm decreased more obviously in introduced species than in native  
345 species (Fig. 5). Immunoblot analysis showed that the content of PsaA protein was  
346 unchanged during winter in native species, but decreased significantly in introduced  
347 species (Fig. 6). It was indicated that the PSI photoinhibition during winter was more  
348 serious in introduced species.

349 Although the Pm significantly decreased in pine, its PsaA content was  
350 maintained during winter (Fig. 4, 6). Previous studies have shown that in cucumber  
351 leaves exposed to chilling-light condition, the PSI photoinhibition occurred firstly in  
352 PSI receptors, the ferredoxin or iron-sulfur cluster (Sonoike *et al.*, 1995b; Tjus *et al.*,  
353 1999; Teicher *et al.*, 2000; Sonoike, 2006), the degradation of core protein of PSI  
354 reaction center occurred as the damage degenerated (Sonoike and Terashima, 1994;  
355 Ivanov *et al.*, 1998; Tjus *et al.*, 1999; Zhang *et al.*, 2016). Therefore, we speculate  
356 that only ferredoxin or iron-sulfur cluster rather than PSI reaction center was  
357 damaged in pine during winter.

358 Active PSI is required for the cyclic electron flow around PSI (CEF). The CEF  
359 can generate a transmembrane proton gradient to activate NPQ and produce ATP that  
360 can be consumed in CO<sub>2</sub> fixation (Yamori and Shikanai, 2016). In addition, the  
361 active PSI can also directly dissipate light energy in the form of P700<sup>+</sup> (Kim *et al.*,

362 2001; Ort, 2001; Bukhov *et al.*, 2004; Suorsa *et al.*, 2012), which may also function  
363 as an effective protective mechanism of the photosynthetic electron transport chain.

364 Maintaining the stability of the PSI reaction center complex is even more  
365 important than PSII, which is due to the recovery of PSI is much slower than PSII  
366 after photoinhibition. Studies have reported that re-synthesis of PSI reaction center  
367 protein is much slower than D1 protein after chilling-light induced photoinhibition  
368 (Kudoh and Sonoike, 2002; Zhang and Scheller, 2004). The Pm recovered much  
369 slower than the  $F_v/F_m$  did, and the recovery of Pm is more sensitive to high light than  
370  $F_v/F_m$  (Zhang and Scheller, 2004; Zhang *et al.*, 2011). During the next spring, the  
371 damaged PSI that can not recover quickly would limit the activity of the whole  
372 photosynthetic apparatus. Therefore, the inactivation of PSI and degradation of PSI  
373 reaction center protein will delay the recovery of photosynthesis during the next  
374 spring in introduced species.

375 This research also showed that the content of Lhca1 protein decreased in all four  
376 species during winter (Fig. 6). It was reported that under PSI photoinhibition  
377 treatment, the LHCI degraded earlier than PSI reaction center protein. And it was  
378 suggested that the degradation of LHCI is helpful for protection of PSI (Alboresi *et*  
379 *al.*, 2009). In other words, the LHCI proteins act as fuses when other photoprotection  
380 mechanisms become insufficient (Alboresi *et al.*, 2009). Our experimental results  
381 also imply that to protect the “precious” PSI reaction center during winter, both  
382 native and introduced species shared the same adaptive strategy: degrading LHCI  
383 that was “cheaper” and reducing the excitation energy to PSI reaction center.

384 In conclusion, the photosynthetic adaptability during winter in overwintering  
385 species introduced to higher latitudes are scarce and this study, for the first time,  
386 compared the photosynthetic adaptability during harsh winter between native and  
387 introduced overwintering species, including woody and herbaceous species. This  
388 study showed that the lower capacity for photosynthetic CO<sub>2</sub> fixation and the more  
389 serious photoinhibition will endanger the survival of introduced overwintering  
390 species during winter; the degradation of photosynthetic related proteins will delay  
391 the recovery of photosynthesis during the next spring and therefore suppress the  
392 growth of introduced overwintering species.

393

#### 394 **Supplementary information**

395 **Supplementary Figure S1** Seasonal variations of pigment in native overwintering  
396 species and introduced overwintering species.

397 **Supplementary Figure S2** Seasonal variations of the relative content of active P700  
398 in native evergreen species and introduced evergreen species.

399

#### 400 **Acknowledgments**

401 This study was supported by the National Natural Science Foundation of China  
402 project (31871544, 31701966, 31771691), Shandong Provincial Natural Science  
403 Foundation, China (ZR2017QC001) and Shandong Province Key Technology

404 Innovation Project (2014GJJS0201-1).

## References

- Adams WW, Demmig-Adams B, Rosenstiel TN, Ebbert V.** 2001. Dependence of photosynthesis and energy dissipation activity upon growth form and light environment during the winter. *Photosynthesis Research* **67**, 51-62.
- Adams WW, Demmig-Adams B, Verhoeven AS, Barker DH.** 1995. 'Photoinhibition' during winter stress: involvement of sustained xanthophyll cycle-dependent energy dissipation. *Functional Plant Biology* **22**, 261-276.
- Adams WW, Zarter CR, Ebbert V, Demmig-Adams B.** 2004. Photoprotective strategies of overwintering evergreens. *Bioscience* **54**, 41-49.
- Alboresi A, Ballottari M, Hienerwadel R, Giacometti GM, Morosinotto T.** 2009. Antenna complexes protect photosystem I from photoinhibition. *BMC Plant Biology* **9**, 71.
- Arnon DI.** 1949. Copper enzymes in isolated chloroplasts. Polyphenoloxidase in *Beta vulgaris*. *Plant Physiology* **24**, 1-15.
- Aro EM, Virgin I, Andersson B.** 1993. Photoinhibition of photosystem II. Inactivation, protein damage and turnover. *Biochimica et Biophysica Acta* **1143**, 113-134.
- Bukhov N, Govindachary S, Rajagopal S, Joly D, Carpentier R.** 2004. Enhanced rates of P700<sup>+</sup> dark-reduction in leaves of *Cucumis sativus* L. photoinhibited at chilling temperature. *Planta* **218**, 852-861.



- Choi S, Jeong S, Jeong W, Kwon S, Chow W, Park YI.** 2002. Chloroplast Cu/Zn-superoxide dismutase is a highly sensitive site in cucumber leaves chilled in the light. *Planta* **216**, 315-324.
- de Bianchi S, Ballottari M, Dall'Osto L, Bassi R.** 2010. Regulation of plant light harvesting by thermal dissipation of excess energy. *Biochemical Society Transactions* **38**, 651-660.
- Demmig-Adams B, Adams WW.** 2000. Photosynthesis: Harvesting sunlight safely. *Nature* **403**, 371-374.
- Ebbert V, Adams WW, Mattoo AK, Sokolenko A, Demmig-Adams B.** 2005. Up-regulation of a photosystem II core protein phosphatase inhibitor and sustained D1 phosphorylation in zeaxanthin-retaining, photoinhibited needles of overwintering Douglas fir. *Plant, Cell & Environment* **28**, 232-240.
- Ensminger I, Sveshnikov D, Campbell DA, Funk C, Jansson S, Lloyd J, Shibistova O, Öquist G.** 2004. Intermittent low temperatures constrain spring recovery of photosynthesis in boreal Scots pine forests. *Global Change Biology* **10**, 995-1008.
- Feller J, Finnegan P, Fitzgerald B, Hayes J.** 2008. From peer production to productization: A study of socially enabled business exchanges in open source service networks. *Information Systems Research* **19**, 475-493.
- Gao J, Li P, Ma F, Goltsev V.** 2014. Photosynthetic performance during leaf expansion in *Malus micromalus* probed by chlorophyll a fluorescence and

modulated 820nm reflection. *Journal of Photochemistry and Photobiology B: Biology* **137**, 144-150.

**Gilmore AM, Ball MC.** 2000. Protection and storage of chlorophyll in overwintering evergreens. *Proceedings of the National Academy of Sciences* **97**, 11098-11101.

**Gilmore AM, Matsubara S, Ball MC, Barker DH, Itoh S.** 2003. Excitation energy flow at 77K in the photosynthetic apparatus of overwintering evergreens. *Plant, Cell & Environment* **26**, 1021-1034.

**Hanba YT, Shibasaka M, Hayashi Y, Hayakawa T, Kasamo K, Terashima I, Katsuhara M.** 2004. Overexpression of the barley aquaporin HvPIP2; 1 increases internal CO<sub>2</sub> conductance and CO<sub>2</sub> assimilation in the leaves of transgenic rice plants. *Plant, Cell & Environment* **45**, 521-529.

**Horton P, Ruban AV, Walters RG.** 1996. Regulation of light harvesting in green plants. *Annual Review of Plant Physiology and Plant Molecular Biology* **47**, 655-684

**Hughes NM.** 2011. Winter leaf reddening in 'evergreen' species. *New Phytologist* **190**, 573-581.

**Ishibashi M, Usuda H, Terashima I.** 1996. The loss of ribulose-1,5-bisphosphate carboxylase/oxygenase caused by 24-hour rain treatment fully explains the decrease in the photosynthetic rate in bean leaves. *Plant Physiology* **111**, 635-640.

**Ivanov AG, Morgan R, Gray GR, Velitchkova MY, Huner NPA.** 1998. Temperature/-light dependent development of selective resistance to

photoinhibition of photosystem I. FEBS Letters **430**, 288-292.

**Ivanov AG, Krol M, Sveshnikov D, Malmberg G, Gardeström P, Hurry V, Öquist G, Huner NPA.** 2006. Characterization of the photosynthetic apparatus in cortical bark chlorenchyma of Scots pine. *Planta* **223**, 1165-1177.

**Ivanov AG, Rosso D, Savitch LV, Stachula P, Rosembert M, Oquist G, Hurry V, Hüner NPA.** 2012. Implications of alternative electron sinks in increased resistance of PSII and PSI photochemistry to high light stress in cold-acclimated *Arabidopsis thaliana*. *Photosynthesis Research* **113**, 191-206.

**Ivanov AG, Sane P, Zeinalov Y, Malmberg G, Gardeström P, Huner N, Öquist G.** 2001. Photosynthetic electron transport adjustments in overwintering Scots pine (*Pinussylvestris* L.). *Planta* **213**, 575-585.

**Ivanov AG, Sane P, Zeinalov Y, Simidjiev I, Huner N, Öquist G.** 2002. Seasonal responses of photosynthetic electron transport in Scots pine (*Pinussylvestris* L.) studied by thermoluminescence. *Planta* **215**, 457-465.

**Jansson S.** 1999. A guide to the Lhc genes and their relatives in Arabidopsis. *Trends in Plant Science* **4**, 236-240.

**Kim SJ, Lee CH, Hope AB, Chow WS.** 2001. Inhibition of photosystems I and II and enhanced back flow of photosystem I electrons in cucumber leaf discs chilled in the light. *Plant, Cell & Environment* **42**, 842-848.

**Klughammer C, Schreiber U.** 2008. Saturation pulse method for assessment of energy conversion in PSI. *PAM Application Notes* **1**, 11-14.

- Kudoh H, Sonoike K.** 2002. Irreversible damage to photosystem I by chilling in the light: cause of the degradation of chlorophyll after returning to normal growth temperature. *Planta* **215**, 541-548.
- Li XP, Björkman O, Shih C, Grossman AR, Rosenquist M, Jansson S, Niyogi KK.** 2000. A pigment-binding protein essential for regulation of photosynthetic light harvesting. *Nature* **403**, 391-395.
- Li Z, Wakao S, Fischer BB, Niyogi KK.** 2009. Sensing and responding to excess light. *Annual Review of Plant Biology* **60**, 239-260.
- Lundmark T, Bergh J, Strand M, Koppel A.** 1998. Seasonal variation of maximum photochemical efficiency in boreal Norway spruce stands. *Trees* **13**, 63-67.
- Makino A.** 2011. Photosynthesis, grain yield, and nitrogen utilization in rice and wheat. *Plant Physiology* **155**, 125-129.
- Makino A, Sakuma H, Sudo E, Mae T.** 2003. Differences between maize and rice in N-use efficiency for photosynthesis and protein allocation. *Plant, Cell & Environment* **44**, 952-956.
- Manuel N, Cornic G, Aubert S, Choler P, Bligny R, Heber U.** 1999. Protection against photoinhibition in the alpine plant *Geum montanum*. *Oecologia* **119**, 149-158.
- Margesin R, Neuner G, Storey KB.** 2007. Cold-loving microbes, plants, and animals-fundamental and applied aspects. *Naturwissenschaften* **94**, 77-99.

**Maslova TG, Mamushina NS, Sherstneva OA, Bubolo LS, Zubkova EK.** 2009.

Seasonal structural and functional changes in the photosynthetic apparatus of evergreen conifers. *Russian Journal of Plant Physiology* **56**, 607-615.

**Matsubara S, Gilmore AM, Ball MC, Anderson JM, Osmond CB.** 2002. Sustained

downregulation of photosystem II in mistletoes during winter depression of photosynthesis. *Functional Plant Biology* **29**, 1157-1169.

**Maxwell K, Johnson GN.** 2000. Chlorophyll fluorescence-a practical guide. *Journal*

of Experimental Botany **51**, 659-668.

**Míguez F, Fernández-Marín B, Becerril JM, García-Plazaola JI.** 2015. Activation

of photoprotective winter photoinhibition in plants from different environments: a literature compilation and meta-analysis. *Physiologia Plantarum* **155**, 414-423.

**Míguez F, Fernández-Marín B, Becerril JM, García-Plazaola JI.** 2017. Diversity

of winter photoinhibitory responses: a case study in co-occurring lichens, mosses, herbs and woody plants from subalpine environments. *Physiologia Plantarum* **160**, 282-296.

**Nakano R, Ishida H, Kobayashi M, Makino A, Mae T.** 2010. Biochemical changes

associated with in vivo RbcL fragmentation by reactive oxygen species under chilling-light conditions. *Plant Biology* **12**, 35-45.

**Nakano R, Ishida H, Makino A, Mae T.** 2006. In vivo fragmentation of the large

subunit of ribulose-1,5-bisphosphate carboxylase by reactive oxygen species in an intact leaf of cucumber under chilling-light conditions. *Plant, Cell & Environment*

47, 270-276.

**Oguchi R, Terashima I, Kou J, Chow WS.** 2011. Operation of dual mechanisms that both lead to photoinactivation of Photosystem II in leaves by visible light. *Physiologia Plantarum* **142**, 47-55.

**Ono Y, Wada S, Izumi M, Makino A, Ishida H.** 2013. Evidence for contribution of autophagy to Rubisco degradation during leaf senescence in *Arabidopsis thaliana*. *Plant, Cell & Environment* **36**, 1147-1159.

**Öquist G, Huner NP.** 2003. Photosynthesis of overwintering evergreen plants. *Annual Review of Plant Biology* **54**, 329-355.

**Ort DR.** 2001. When there is too much light. *Plant Physiology* **125**, 29-32.

**Ottander C, Campbell D, Öquist G.** 1995. Seasonal changes in photosystem II organisation and pigment composition in *Pinussylvestris*. *Planta* **197**, 176-183.

**Pieruschka R, Albrecht H, Muller O, Berry JA, Klimov D, Kolber ZS, Malenovský Z, Rascher U.** 2014. Daily and seasonal dynamics of remotely sensed photosynthetic efficiency in tree canopies. *Tree Physiology* **34**, 674-685.  
doi:10.1093/treephys/tpu035

**Porcar-Castell A.** 2011. A high-resolution portrait of the annual dynamics of photochemical and non-photochemical quenching in needles of *Pinussylvestris*. *PhysiologiaPlantarum* **143**, 139-153.

**Porcar-Castell A, Juurola E, Nikinmaa E, Berninger F, Ensminger I, Hari P.**

2008. Seasonal acclimation of photosystem II in *Pinussylvestris*. I. Estimating the rate constants of sustained thermal energy dissipation and photochemistry. *Tree Physiology* **28**, 1475-1482.

**Porra RJ, Thompson WA, Kriedemann PE.** 1989. Determination of accurate extinction coefficients and simultaneous equations for assaying chlorophylls a and b extracted with four different solvents: verification of the concentration of chlorophyll standards by atomic absorption spectroscopy. *Biochimica et Biophysica Acta (BBA)-Bioenergetics* **975**, 384-394.

**Raines CA.** 2003. The Calvin cycle revisited. *Photosynthesis Research* **75**, 1-10.

**Robakowski P.** 2005. Susceptibility to low-temperature photoinhibition in three conifers differing in successional status. *Tree Physiology* **25**, 1151-1160.

**Russell RB, Lei TT, Nilsen ET.** 2009. Freezing induced leaf movements and their potential implications to early spring carbon gain: *Rhododendron maximum* as exemplar. *Functional Ecology* **23**, 463-471.

**Sandmann G.** 2014. Carotenoids of biotechnological importance. *Advances in Biochemical Engineering/Biotechnology* **148**, 1-19.

**Savitch LV, Ivanov AG, Krol M, Sprott DP, Öquist G, Huner NP.** 2010. Regulation of energy partitioning and alternative electron transport pathways during cold acclimation of lodgepole pine is oxygen dependent. *Plant, Cell & Environment* **51**, 1555-1570.

**Savitch LV, Leonardos ED, Krol M, Jansson S, Grodzinski B, Huner NPA,**

**Öquist G.** 2002. Two different strategies for light utilization in photosynthesis in relation to growth and cold acclimation. *Plant, Cell & Environment* **25**, 761-771.

**Silva-Cancino MC, Esteban R, Artetxe U, Plazaola JIG.** 2012. Patterns of

spatio-temporal distribution of winter chronic photoinhibition in leaves of three evergreen Mediterranean species with contrasting acclimation responses. *Physiologia Plantarum* **144**, 289-301.

**Sonoike K.** 1995. Selective photoinhibition of photosystem I in isolated thylakoid

membranes from cucumber and spinach. *Plant, Cell & Environment* **36**, 825-830.

**Sonoike K.** 2002. Irreversible damage to photosystem I by chilling in the light: cause

of the degradation of chlorophyll after returning to normal growth temperature. *Planta* **215**, 541-548.

**Sonoike K.** 2006. Photoinhibition and protection of photosystem I. In: Golbeck JH,

eds. *Photosystem I*. Dordrecht: Springer Press, 657-668.

**Sonoike K.** 2011. Photoinhibition of photosystem I. *Physiologia Plantarum* **142**,

56-64.

**Sonoike K, Terashima I.** 1994. Mechanism of photosystem-I photoinhibition in

leaves of *Cucumis sativus* L. *Planta* **194**, 287-293.

**Suorsa M, Järvi S, Grieco M, et al.** 2012. PROTON GRADIENT REGULATIONS

is essential for proper acclimation of Arabidopsis photosystem I to naturally and



artificially fluctuating light conditions. *The Plant Cell* **24**, 2934-2948.

**Takahashi S, Bauwe H, Badger M.** 2007. Impairment of the photorespiratory pathway accelerates photoinhibition of photosystem II by suppression of repair but not acceleration of damage processes in Arabidopsis. *Plant Physiology* **144**, 487-494.

**Takahashi S, Milward SE, Fan DY, Chow WS, Badger MR.** 2009. How does cyclic electron flow alleviate photoinhibition in Arabidopsis? *Plant Physiology* **149**, 1560-1567.

**Takahashi S, Badger MR.** 2011. Photoprotection in plants: a new light on photosystem II damage. *Trends in Plant Science* **16**, 53-60.

**Teicher HB, Mølle BL, Scheller HV.** 2000. Photoinhibition of photosystem I in field-grown barley (*Hordeumvulgare* L.): induction, recovery and acclimation. *Photosynthesis Research* **64**, 53-61.

**Tikkanen M, Mekala NR, Aro EM.** 2014. Photosystem II photoinhibition-repair cycle protects Photosystem I from irreversible damage. *Biochimica et BiophysicaActa (BBA)-Bioenergetics* **1837**, 210-215.

**Tjus SE, Møller BL, Scheller HV.** 1999. Photoinhibition of photosystem I damages both reaction centre proteins PSI-A and PSI-B and acceptor-side located small photosystem I polypeptides. *Photosynthesis Research* **60**, 75-86.

**Vass I.** 2012. Molecular mechanisms of photodamage in the Photosystem II complex. *Biochimica et Biophysica Acta (BBA)-Bioenergetics* **1817**, 209-217.

- Verhoeven A.** 2014. Sustained energy dissipation in winter evergreens. *New Phytologist* **201**, 57-65.
- Verhoeven A, Osmolak A, Morales P, Crow J.** 2009. Seasonal changes in abundance and phosphorylation status of photosynthetic proteins in eastern white pine and balsam fir. *Tree Physiology* **29**, 361-374.
- Verhoeven AS.** 2013. Recovery kinetics of photochemical efficiency in winter stressed conifers: the effects of growth light environment, extent of the season and species. *Physiologia Plantarum* **147**, 147-158.
- Verhoeven AS, Adams WW, Demmig-Adams B.** 1999. The xanthophyll cycle and acclimation of *Pinus ponderosa* and *Malvaneglecta* to winter stress. *Oecologia* **118**, 277-287.
- Wong CY, Gamon JA.** 2015. The photochemical reflectance index provides an optical indicator of spring photosynthetic activation in evergreen conifers. *New Phytologist* **206**, 196-208.
- Yamori W, Shikanai T.** 2016. Physiological functions of cyclic electron transport around photosystem I in sustaining photosynthesis and plant growth. *Annual Review of Plant Biology* **67**, 81-106.
- Yokono M, Akimoto S, Tanaka A.** 2008. Seasonal changes of excitation energy transfer and thylakoid stacking in the evergreen tree *Taxus cuspidata*: How does it divert excess energy from photosynthetic reaction center? *Biochimica et Biophysica Acta (BBA)-Bioenergetics* **1777**, 379-387.

- Yoshioka-Nishimura M, Yamamoto Y.** (2014). Quality control of photosystem II: the molecular basis for the action of FtsH protease and the dynamics of the thylakoid membranes. *Journal of Photochemistry and Photobiology B: Biology* **137**, 100-106.
- Zarter CR, Adams WW, Ebbert V, Cuthbertson DJ, Adamska I, Demmig-Adams B.** 2006. Winter down-regulation of intrinsic photosynthetic capacity coupled with up-regulation of Elip-like proteins and persistent energy dissipation in a subalpine forest. *New Phytologist* **172**, 272-282.
- Zhang S, Scheller HV.** 2004. Light-harvesting complex II binds to several small subunits of photosystem I. *Journal of Biological Chemistry* **279**, 3180-3187.
- Zhang S, Scheller HV.** 2004. Photoinhibition of photosystem I at chilling temperature and subsequent recovery in *Arabidopsis thaliana*. *Plant, Cell & Environment* **45**, 1595-1602.
- Zhang ZS, Jia YJ, Gao HY, Zhang LT, Li HD, Meng QW.** 2011. Characterization of PSI recovery after chilling-induced photoinhibition in cucumber (*Cucumis sativus* L.) leaves. *Planta* **234**, 883-889.
- Zhang ZS, Jin LQ, Li YT, Tikkanen M, Li QM, Ai XZ, Gao HY.** 2016. Ultraviolet-B radiation (UV-B) relieves chilling-light-induced PSI photoinhibition and accelerates the recovery of CO<sub>2</sub> assimilation in Cucumber (*Cucumis sativus* L.) leaves. *Scientific Reports* **6**, 34455.
- Zhang ZS, Liu MJ, Scheibe R, Selinski J, Zhang LT, Yang C, Meng XL, Gao HY.**

2017. Contribution of the alternative respiratory pathway to PSII photoprotection in C3 and C4 plants. *Molecular Plant* **10**, 131-142.

**Zhang ZS, Yang C, Gao HY, Zhang LT, Fan XL, Liu MJ.** 2014. The higher sensitivity of PSI to ROS results in lower chilling–light tolerance of photosystems in young leaves of cucumber. *Journal of Photochemistry and Photobiology B: Biology* **137**, 127-134.

## Figure legends

**Fig. 1 Seasonal variations of temperature, light intensity and illumination duration.** Daily maximum (A, solid line) and minimum temperature (A, dashed line) from October 2017 to May 2018. The maximum (A, filled circles) or minimum temperature (A, open circles), the daily maximum light intensity (PPFD; B, filled circles), average light intensity (B, open circles) and illumination duration (C) at the day of the experiment.

**Fig. 2 Seasonal variations of pigment in native overwintering species and introduced overwintering species.** Total chlorophyll content (Chla + Chlb; A, B), the ratio of Chla to Chlb (Chla / Chlb; C, D), the carotenoids content (E, F) and the ratio of carotenoids to chlorophyll content (Car / Chl; G, H) in two native overwintering species, lacebark pine (*Pinus bungeana*) and winter wheat (*Triticum aestivum*), as well as two introduced overwintering species, bamboo (*Phyllostachys glauca*) and lilyturf (*Ophiopogon japonicus*). The results are presented as percentages from the values observed on Oct. 20 (100%). Actual experimental data are shown in Supplementary Figure S1. All data points represent mean values  $\pm$  SD calculated from 5 independent measurements. Different letters indicate significant differences at  $P < 0.05$  between different time. The asterisk indicates significant differences at  $P < 0.05$  between different species.

**Fig. 3 Seasonal variations of the net photosynthetic rates (P<sub>n</sub>) in native overwintering species and introduced overwintering species.** Two native overwintering species pine (*Pinus bungeana*) and winter wheat (*Triticum aestivum*; A), as well as two introduced overwintering species bamboo (*Phyllostachys glauca*) and lilyturf (*Ophiopogon japonicus*; B) were used. The results are presented as percentages from the values observed on Oct. 20 (100%). The original values of P<sub>n</sub> were listed in insert. All data points represent mean values ± SD calculated from 5 independent measurements. Different letters indicate significant differences at P < 0.05 between different time. The asterisk indicates significant differences at P < 0.05 between different species.

**Fig. 4 Seasonal variations of the maximum quantum yield of PSII (F<sub>v</sub>/F<sub>m</sub>) in native overwintering species and introduced overwintering species.** Two native overwintering species pine (*Pinus bungeana*) and winter wheat (*Triticum aestivum*; A), as well as two introduced overwintering species bamboo (*Phyllostachys glauca*) and lilyturf (*Ophiopogon japonicus*; B) were used. All data points represent mean values ± SD calculated from 10 independent measurements. Different letters indicate significant differences at P < 0.05 between different time. The asterisk indicates significant differences at P < 0.05 between different species.

**Fig. 5 Seasonal variations of the relative content of the active PSI reaction centers (P<sub>m</sub>) measured as P700<sup>+</sup> in native overwintering species and introduced**

**overwintering species.** Two native overwintering species pine (*Pinus bungeana*) and winter wheat (*Triticum aestivum*; A), as well as two introduced overwintering species bamboo (*Phyllostachys glauca*) and lilyturf (*Ophiopogon japonicus*; B). The values are presented as percentages from the Pm (P700<sup>+</sup>) values observed on Oct. 20 (100%). Actual experimental data are shown in Supplementary Figure S2. All data points represent mean values  $\pm$  SD calculated from 20 independent measurements. Different letters indicate significant differences at  $P < 0.05$  between different time. The asterisk indicates significant differences at  $P < 0.05$  between different species.

**Fig. 6 Seasonal variations of the photosynthesis related proteins innate overwintering species and introduced overwintering species.** Two native overwintering species pine (*Pinus bungeana*) and winter wheat (*Triticum aestivum*; A), as well as two introduced overwintering species bamboo (*Phyllostachys glauca*) and lilyturf (*Ophiopogon japonicus*; B). The leaves were collected on Oct. 20 2017, Jan. 24 and Mar. 26 2018. The polypeptides were probed with specific antibodies raised against Rubisco large subunit (RbcL; A, D), PsbA (B, E), Lhcb1 (C, F), PsbS (G, J), PsaA (H, K) and Lhca1 (I, L). The typical immunoblots were presented in plots A-C and G-I, the data of quantitative densitometric analysis were presented in plots D-F and J-L. In plots d-f and J-L, all data points represent mean values  $\pm$  SD calculated from three independent measurements. Different letters indicate significant differences at  $P < 0.05$  between different time. The asterisk indicates significant differences at  $P < 0.05$  between different species.

## Figure

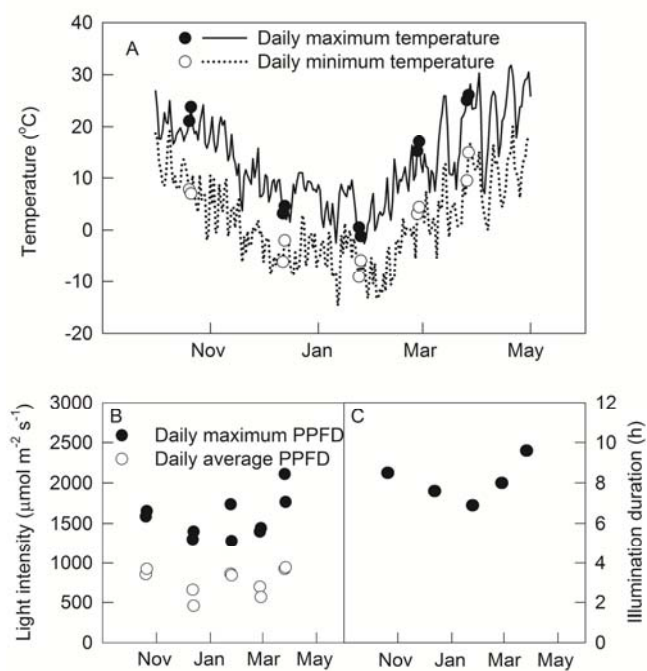

Fig. 1 Seasonal variations of temperature, light intensity and illumination duration.



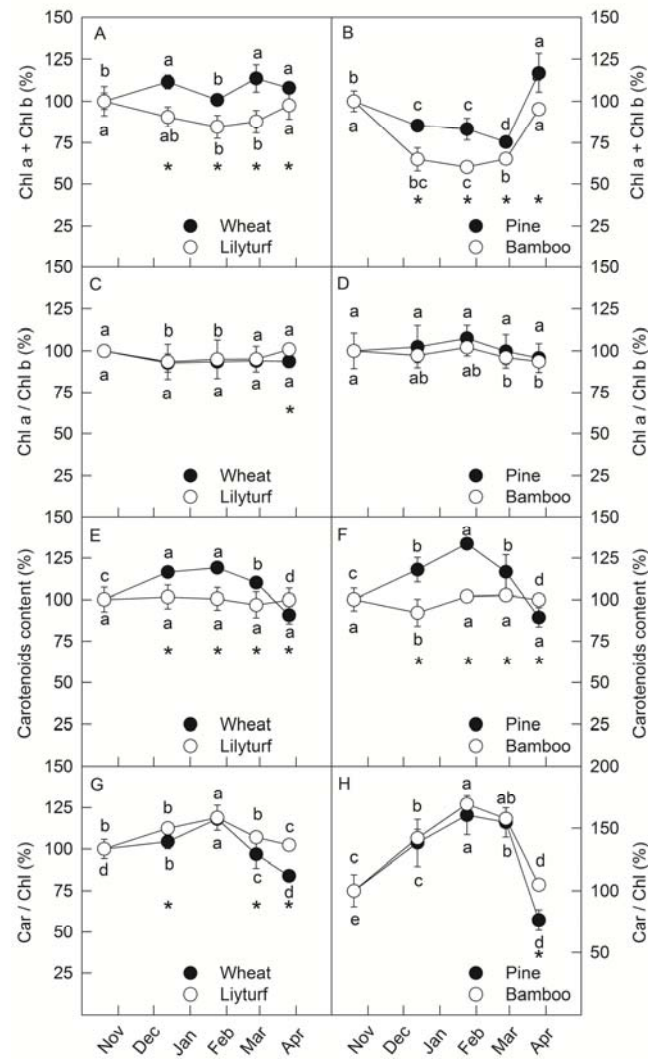

Fig. 2 Seasonal variations of pigment in native overwintering species and introduced overwintering species.

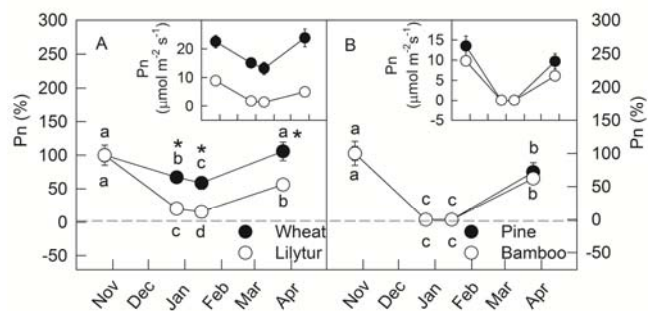

Fig. 3 Seasonal variations of the net photosynthetic rates (Pn) in native overwintering species and

introduced overwintering species.

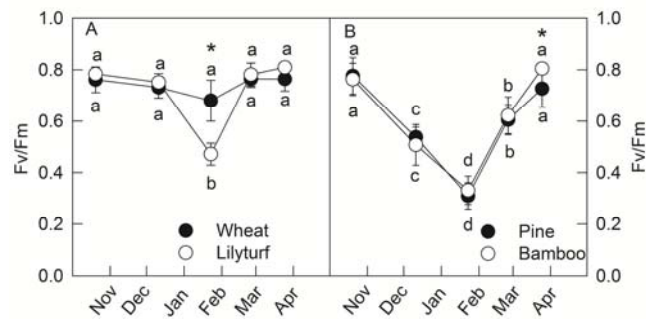

Fig. 4 Seasonal variations of the maximum quantum yield of PSII ( $F_v/F_m$ ) in native overwintering

species and introduced overwintering species.

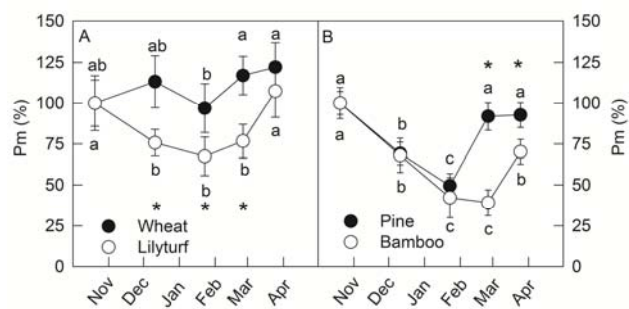

Fig. 5 Seasonal variations of the relative content of the active PSI reaction centers (Pm) measured as

P700<sup>+</sup> in native overwintering species and introduced overwintering species.

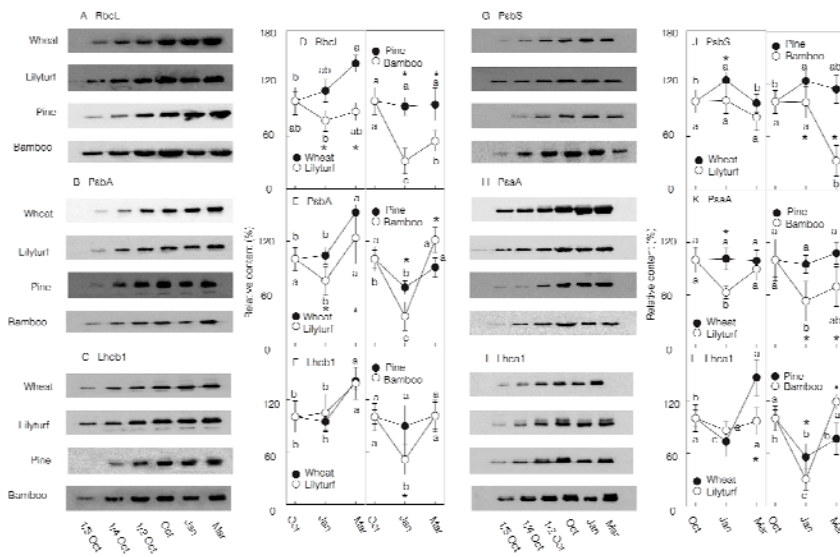

Fig. 6 Seasonal variations of the photosynthesis related proteins in native overwintering species and introduced overwintering species.

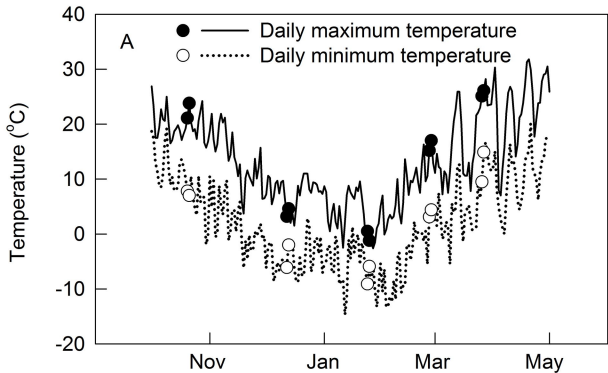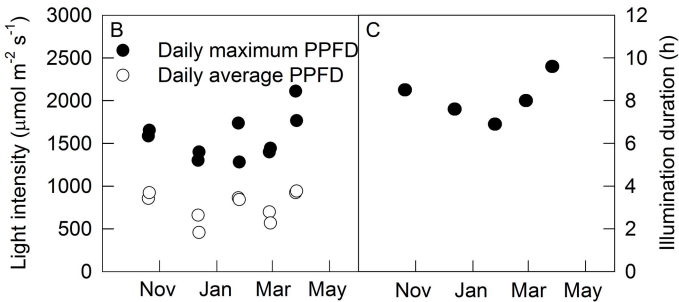

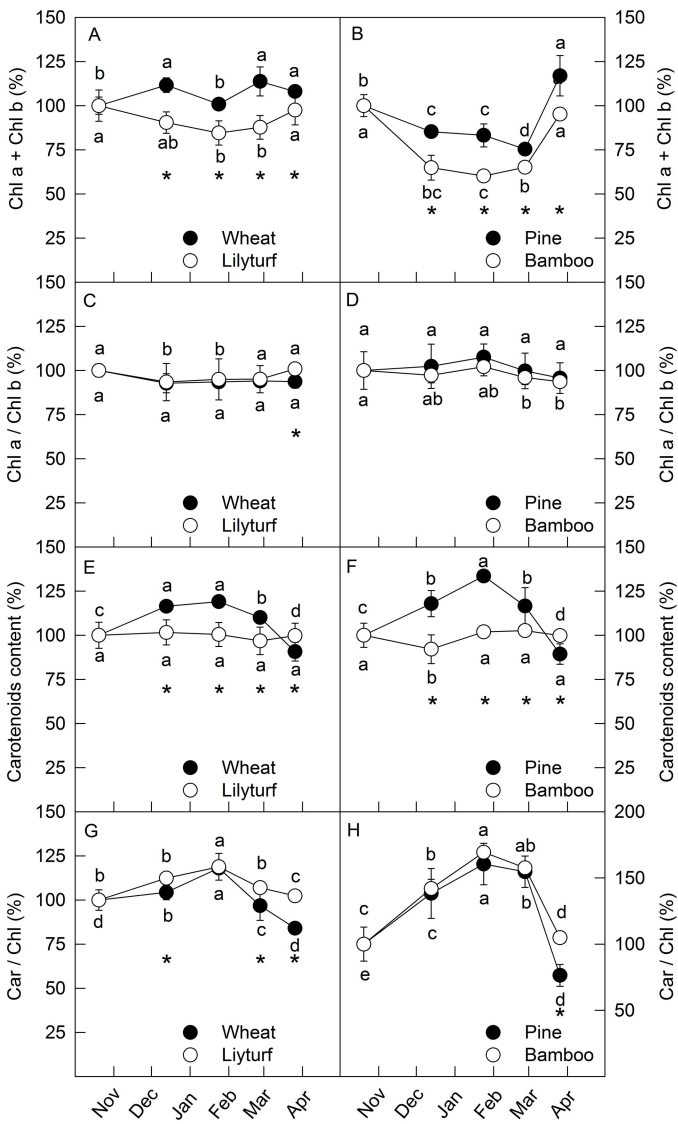

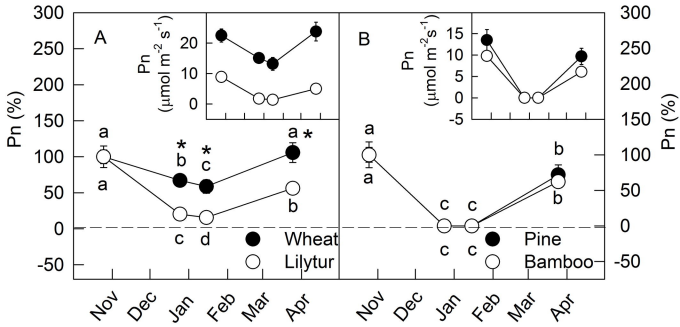



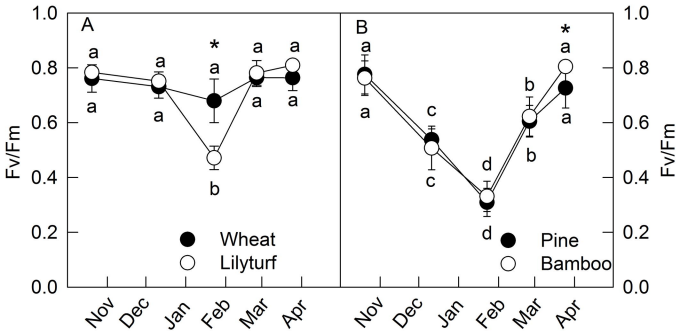

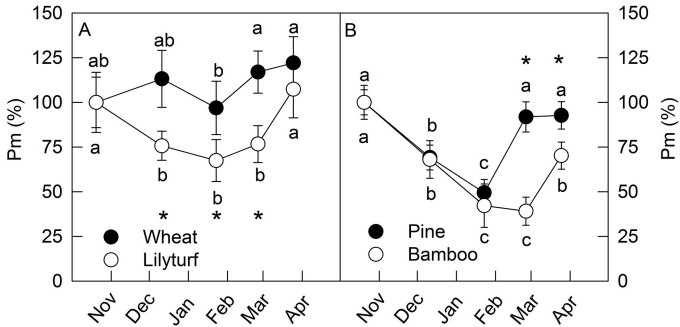

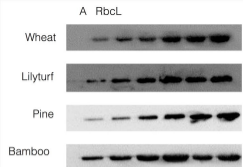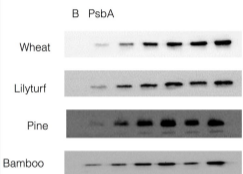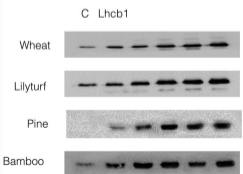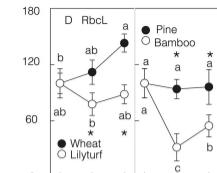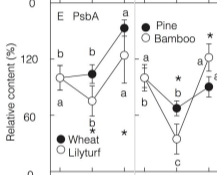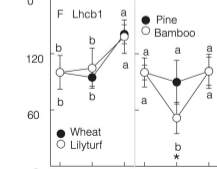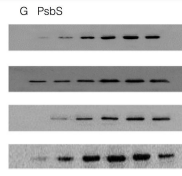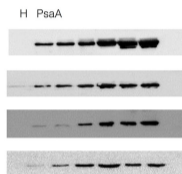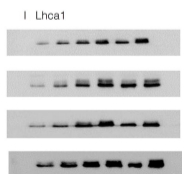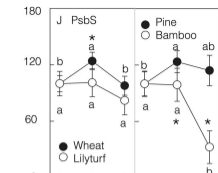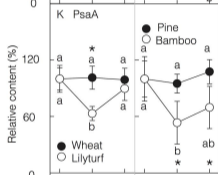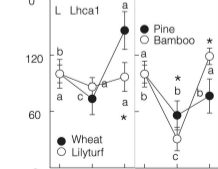

Source: https://biorxiv.org/content/biorxiv/early/2019/04/18/613117.full-text.pdf
